# Supplementary material
Source: PubMed Central journal article supplement (PMC6605039)

## SUPPLEMENTAL FIGURES

**Fig. S1. Effect of TGF- $\beta$ 2 on PHD-2 protein content in human lens epithelial cells.** The cells were treated with TGF- $\beta$ 2 (10 ng/ml) for 16, or 24 (A) or 48 h (B) and the PHD-2 protein content was measured by Western blotting. The densitometric analyses from triplicate assays (means  $\pm$  SD) are shown in bar graphs. NS = not significant.

**A**

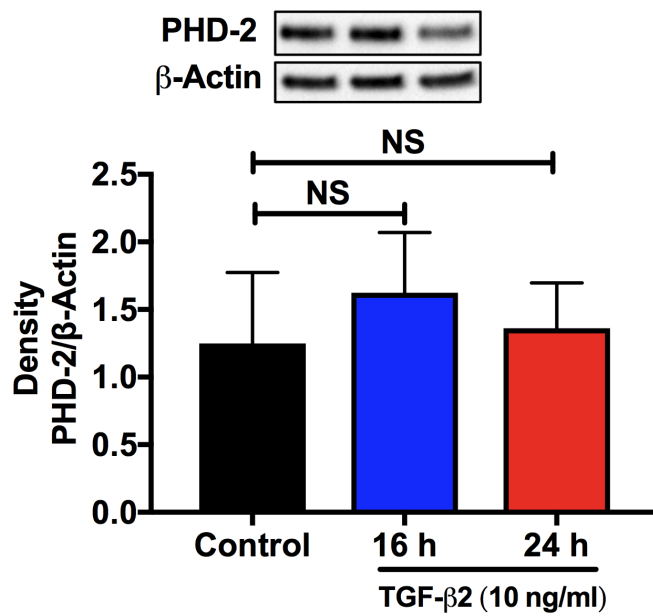

**B**

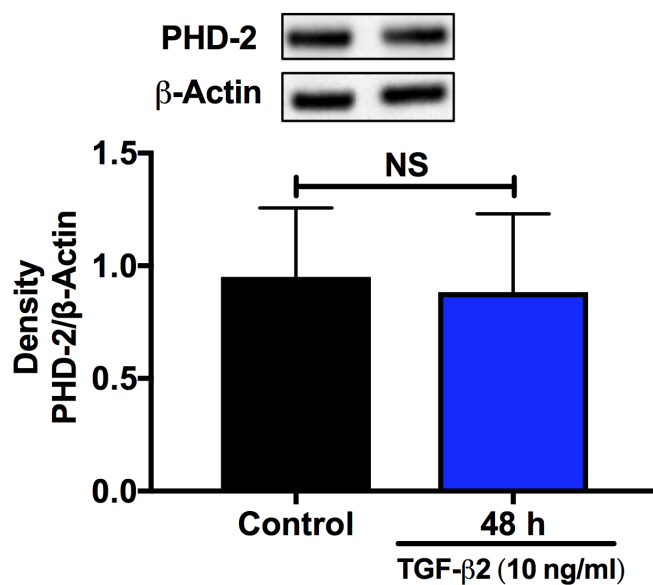

**Fig. S2. Effect of TGF- $\beta$ 2 or VEGF-A on VEGFR2 phosphorylation in human lens epithelial cells.** FHL124 cells were treated with TGF- $\beta$ 2 (10 ng/ml) or human recombinant VEGF-A (10 ng/ml) for 24 h. Phosphorylated VEGFR2 (p-VEGFR2) was measured by Western blotting and the membranes were re-probed for total VEGFR2 (t-VEGFR2). A, cells treated with or without TGF- $\beta$ 2 and B, cells treated with or without VEGF-A. 1 and 3 are untreated, 2 = TGF- $\beta$ 2 treated, 3= VEGF-A treated, a = human umbilical vein endothelial cell lysate and b = human retinal endothelial cell lysate.

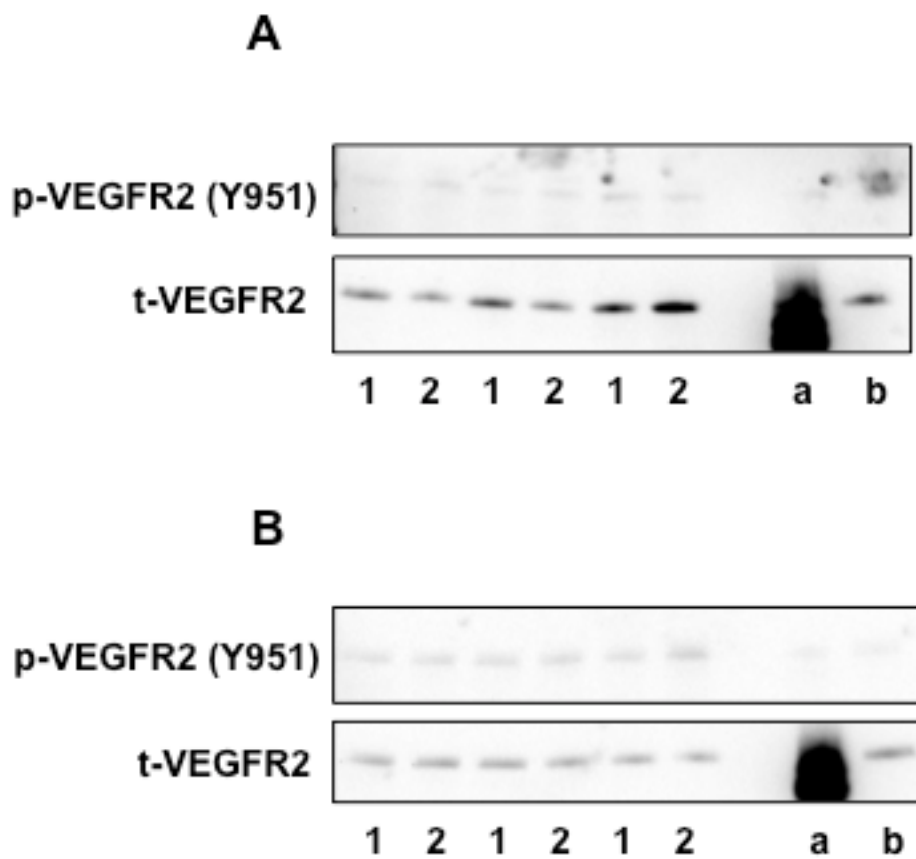

**Fig. S3. Effect of KC7F2 on the TGF- $\beta$ 2-mediated loss of E-cadherin.** FHL124 cells were treated as mentioned in Fig.4, except for just one concentration of KC7F2 (200 nM). E-cadherin protein content was measured by Western blotting. The densitometric analyses from triplicate assays (means  $\pm$  SD) are shown in bar graph. \* $p$ <0.05 and NS = not significant.

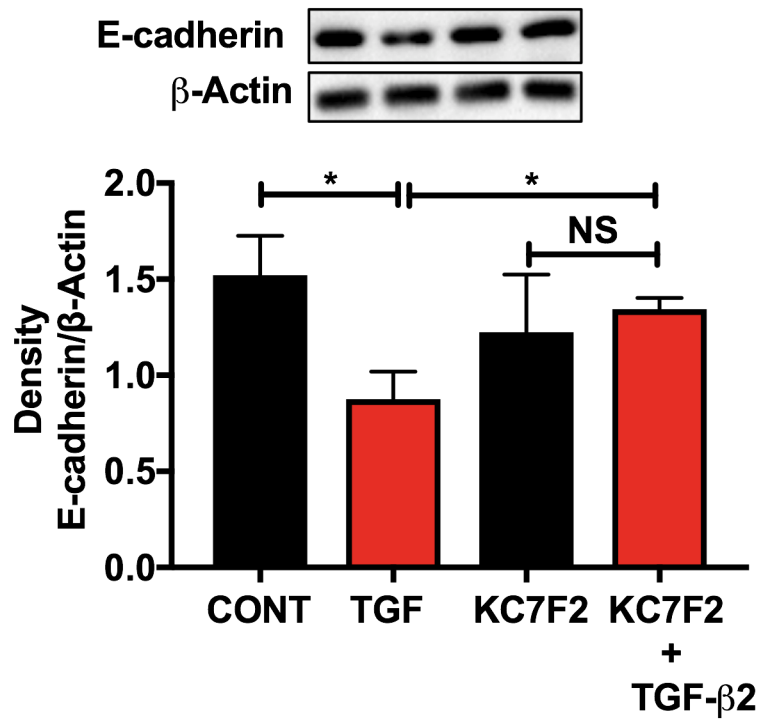

Supplement: NIHMS1036791-supplement-Supplemetary_Material.pdf [file NIHMS1036791-supplement-Supplemetary_Material.pdf]
